## 1 Title

2 Genetic manipulation using hepatocyte-targeting adeno-associated viral vectors has minimal off-  
3 target effects.

4

## 5 Keywords

6 Adeno-Associated Virus, liver disease, mouse model, genetic models

7

## 8 Authors

9 Christos Kiourtis<sup>1,2</sup>, Ania Wilczynska<sup>1,2</sup>, Colin Nixon<sup>1</sup>, William Clark<sup>1</sup>, Stephanie May<sup>1</sup>, Thomas G  
10 Bird<sup>1,3</sup>

11

## 12 Affiliations

13 <sup>1</sup>Cancer Research UK Beatson Institute, Glasgow, G61 1BD, UK.

14 <sup>2</sup>Institute of Cancer Sciences, University of Glasgow, Glasgow G61 1QH, United Kingdom.

15 <sup>3</sup>MRC Centre for Inflammation Research, The Queen's Medical Research Institute, University of  
16 Edinburgh, EH164TJ, UK.

17

## 18 Summary statement

19 This paper provides a comprehensive characterisation of the short-term effects of  
20 administration of Adeno-Associated Virus 8 on murine physiology, liver histology and liver  
21 transcriptome.

22

23 Word count: 5962

24 Number of figures: 4

25

## 26 Abstract

27 Mice are a widely used pre-clinical model system in large part due to their potential for genetic  
28 manipulation. The ability to manipulate gene expression in specific cells under temporal control is a  
29 powerful experimental tool. The liver is central to metabolic homeostasis and a site of many diseases,  
30 making the targeting of hepatocytes attractive. Adeno-Associated Virus 8 (AAV8) vectors are valuable

31 instruments for the manipulation of hepatocellular gene expression. However, their off-target effects  
32 in mice have not been thoroughly explored. Here, we sought to identify the short-term off-target  
33 effects of AAV8 administration in mice. To do this, we injected C57BL/6J Wild-Type mice with either  
34 recombinant AAV8 vectors expressing Cre recombinase or empty AAV8 vectors and characterised the  
35 changes in general health and in liver physiology, histology and transcriptomics compared to  
36 uninjected controls over 1 week. We observed an acute and transient reduction in homeostatic liver  
37 proliferation together with induction of the DNA damage marker  $\gamma$ H2AX following AAV8  
38 administration. The latter was enhanced upon Cre recombinase expression by the vector.  
39 Furthermore, we observed transcriptional changes in genes involved in circadian rhythm and response  
40 to infection. Notably, there were no additional transcriptomic changes upon expression of Cre  
41 recombinase by the AAV8 vector. Overall, there was no evidence of liver injury, dysfunction or  
42 leukocyte infiltration following AAV8 infection. These data support the use of AAV8-based Cre  
43 recombinase delivery as a specific tool for hepatocellular gene manipulation with minimal effects on  
44 murine physiology but highlight the off target effects of these systems.

45

## 46 Introduction

47 Animal models have improved our understanding and therapies for human disease. The mouse  
48 is a prototypical model organism that is widely used for a number of reasons, including its similarities  
49 with human physiology, breeding efficiency and ease of handling, cost efficiency and the range of  
50 available genetic models. Due to the latter particularly, mice have become the most widely used *in*  
51 *vivo* pre-clinical model system (Rosenthal and Brown, 2007). Manipulation of gene expression in this  
52 model organism has come a long way from whole body knock-out (KO) to the current point that we  
53 are able to introduce point mutations in a tissue specific manner through CRISPR-Cas9 genomic editing  
54 (Sauer and Henderson, 1988; Wilson, 1996; Lee, Yoon and Kim, 2020; Lundin *et al.*, 2020). The Cre-Lox  
55 system, although less flexible compared to CRISPR, remains widely used for the manipulation of gene  
56 expression in mice and is an readily applicable means of genomic editing with high reproducibility.

57

58 Taking advantage of the Cre-Lox system, Adeno-Associated Viruses (AAVs) are an important  
59 vector system for gene expression manipulation and their use has risen dramatically in the last 20  
60 years. AAVs, being replication deficient, are a relatively safe and efficient way to express the Cre  
61 recombinase, overexpress specific proteins or introduce shRNA into *in vivo* model systems. AAVs are  
62 small (20nm), single-stranded DNA viruses that belong to the family of Parvoviridae. They elicit a very  
63 mild immune response, especially the recombinant AAV vectors (rAAVs) which have undergone  
64 modifications to partly evade the immune system (Rogers *et al.*, 2011; Rabinowitz, Chan and Samulski,

65 2019). There are different serotypes of AAV (AAV1, 2, 4, 5, 6, 7, 8, and 9), each of which exhibits a  
66 different transduction efficiency in the different target tissues (Zincarelli *et al.*, 2008). In mice, after  
67 infecting their target cells, AAVs enter the cell nucleus where they persist in an episomal form and only  
68 rarely integrate into the host genome (Duan *et al.*, 1999; Miller, Petek and Russell, 2004).

69

70 The liver is the largest solid organ in the body and is a frequent site of organ-specific and  
71 systemic diseases and a frequent site of tumour metastasis. In liver biology, studying hepatocytes is  
72 particularly important as they constitute the majority of liver cells, comprising around 60% of total  
73 liver mass. Hepatocytes perform most of the synthetic and detoxification functions of the liver and are  
74 responsible for liver regeneration as well as being the cell of origin of the majority of primary liver  
75 cancers (Müller, Bird and Nault, 2020). As a result, genetic manipulation of hepatocytes is a powerful  
76 tool in the study of liver disease.

77

78 There are a number of ways to manipulate hepatocellular gene expression (Kellendonk *et al.*,  
79 2000). Currently, a widely used approach is to target hepatocytes with an AAV-based vector. rAAV8 is  
80 a commonly used AAV serotype due to its strong propensity to transduce hepatocytes (Nakai *et al.*,  
81 2005). rAAV8-mediated hepatocellular gene editing has multiple applications including gene therapy  
82 (Smith *et al.*, 2011), lineage tracing experiments, gene deletion or gene overexpression in all or specific  
83 populations of the hepatocytes. Through the insertion of tissue specific promoters vector tropism for  
84 a specific tissue or cell type can be enhanced. In particular, the Cre recombinase together with a  
85 hepatocyte-specific promoter like the Thyroxin Binding Globulin (*TBG*) promoter can be incorporated  
86 into the AAV8 genome and this is reported to be a specific means of Cre recombinase expression in  
87 hepatocytes, while avoiding undesired transduction of extrahepatic cells (Nakai *et al.*, 2005; Malato *et al.*  
88 *et al.*, 2011; Lee *et al.*, 2020). The number of transduced hepatocytes is proportional to the dose (i.e.  
89 genetic copies) of AAV8-*TBG* vector that are administered; the higher the dose of the vector, the more  
90 hepatocytes will be transduced. This allows the study of deleting/overexpressing a gene in the whole  
91 liver parenchyma (Bird *et al.*, 2018) or in a small number of hepatocytes using comparatively fewer  
92 genetic copies of vector. Alternatively, instead of the Cre recombinase, it is possible to deliver other  
93 constructs as “cargo” (e.g. expression of shRNAs or ectopic proteins) to hepatocytes using this  
94 approach; for example, administration of the AAV8-*TBG*-P21 vector results in P21 upregulation in  
95 hepatocytes, inhibiting their ability to proliferate (Raven *et al.*, 2017). Expression of ectopic proteins  
96 with AAV vectors has been reported to last for several months, at least in post-mitotic cells (Duan *et al.*  
97 *et al.*, 1999).

98

99           The AAV8 system theoretically allows for manipulation of gene expression at a desired time  
100 point and without inducing toxicity or the risk of genetic ‘leakiness’ through an endogenous Cre allele.  
101 This is in comparison to other models like the Albumin-Cre mice, where the Cre recombinase is  
102 constitutively expressed from embryonic life and is therefore not temporally controlled, or tamoxifen-  
103 mediated manipulation of gene expression, where tamoxifen has been reported to induce toxicity  
104 (Gao *et al.*, 2016; Keeley, Horita and Samuelson, 2019). As such, AAV8-TBG is widely used in order to  
105 recombine the majority of the hepatocytes (90-95%) and study the effects of gene expression changes  
106 in the whole liver serving as a single hit, hepatocyte-specific gene knock-out/overexpression.

107  
108           With the report that AAVs may have long lasting effects upon the liver epithelium, including rare  
109 cancers, it is clear than transduction with AAV is not entirely benign (Nault *et al.*, 2015). Even though  
110 in humans evidence suggests that the immune system might compromise AAV8 efficiency (partly due  
111 to cross-immunity with Adenoviruses) there haven’t been detailed studies on the murine immune  
112 response against AAV8 (Boutin *et al.*, 2010; Mendell *et al.*, 2010; Calcedo *et al.*, 2011). Furthermore,  
113 as rAAV8 rarely integrates into the murine host genome, it seems unlikely that it would cause  
114 significant genotoxicity. In one study investigating the long term effects of AAV2-hFIX16 (which results  
115 in liver-specific expression of clotting factor IX) in liver tumourigenesis in mice, it was found that there  
116 was no association between tissue from hepatocellular carcinomas (HCCs) and AAV copy numbers (Li,  
117 Malani and Hamilton, 2011).

118  
119           Transcriptome-wide studies are commonly performed on whole liver lysates or isolated liver cell  
120 fractions of mice treated with AAV8-TBG-Cre. These transcriptomics analyses can give valuable  
121 information on the effects following manipulation of hepatocellular gene expression via AAV8-TBG-  
122 Cre. However, a potential effect on the transcriptome by the AAV8 vector or by its “cargo” (i.e. the Cre  
123 recombinase or other protein expressed by the vector) should be taken into consideration when  
124 performing and interpreting such studies. To our knowledge there are currently no studies addressing  
125 whether AAV vectors (and in particular AAV8-TBG) alone have an effect on the liver transcriptome.

126  
127           Overall, there is a lack of descriptive studies on the effects of systemic AAV8 administration in  
128 mice. Therefore, to address this shortfall we investigated the short-term off-target effects of systemic  
129 AAV8-TBG administration in Wild-Type (WT) mice. After intravenous (i.v.) injection of AAV8-TBG-Cre  
130 (expressing Cre recombinase) or AAV8-TBG-Null (expressing a scrambled sequence) at dosing resulting  
131 in transduction across the entire hepatocyte compartment we examined both liver specific and  
132 systemic alterations in WT mice. Using blood analysis combined with immunohistochemistry and

133 transcriptomics analysis we describe the effects occurring over a week post transduction. These data  
134 confirm minor off target effects following transduction using this experimental strategy and serve as  
135 a reference tool for the research community.

136

## 137 Results

### 138 *AAV8-TBG is hepatocyte-specific.*

139 We first examined the tissue and cell specificity of AAV8-TBG using mice homozygote for the  
140 R26-LSL-tdTomato allele on a C57BL/6 background by simultaneous injection with AAV8-TBG-Cre and  
141 AAV8-TBG-GFP (herein referred to as AAV-Cre and AAV-GFP respectively) (Fig. 1A). The cells expressing  
142 the GFP and RFP reporters 7 days after AAV8 injection were assessed histologically first in the liver,  
143 demonstrating that almost all hepatocytes expressed the reporters (Fig. 1B), consistent with previous  
144 reports using this (Bird *et al.*, 2018; Gay *et al.*, 2019) and other AAV8-Cre constructs (Malato *et al.*,  
145 2011). There was no evidence of recombination of biliary epithelium or other non-parenchymal  
146 populations in the liver. Interestingly, while RFP staining was distributed evenly across the  
147 hepatocytes, the GFP distribution was more irregular and its intensity varied among hepatocytes, with  
148 a tendency for more intense staining in the hepatocytes surrounding the central vein (pericentral  
149 hepatocytes of Zone 3) (Fig. 1B). Notably, when we checked for reporter expression in other organs,  
150 we observed labelling of very few cells in the duodenum, kidney, pancreas, lung and the spleen (Fig.  
151 1C, 1D). The apparent GFP positivity observed in the duodenum and the spleen of uninjected mice  
152 (Fig. 1C, inset images) appears as non-specific background staining. These data show, in agreement  
153 with other studies (Wang *et al.*, 2010; Bell *et al.*, 2011), that AAV8-TBG-mediated gene targeting is  
154 highly specific for hepatocytes with negligible targeting of extra-hepatic tissues.

155

### 156 *Systemic administration of AAV8-TBG does not affect the general health of mice.*

157 To investigate the off-target effects of systemic AAV8-TBG administration, WT mice were i.v.  
158 injected with AAV8-TBG-Null (herein referred to as AAV-Null) or AAV-Cre. Mice were then culled 2, 4  
159 or 7 days post AAV8-TBG injection and compared to uninjected controls using a number of clinical  
160 parameters (Fig. 2A). Starting at a similar body weight at day 0 (Fig. S1A), the mice showed no  
161 significant changes in body weight and gradually gained weight at a normal rate for their age during  
162 the week after AAV-Null or AAV-Cre, regardless of the group (Fig. 2B). Haematology analysis showed  
163 no changes in haematocrit, red blood cells and platelets (Fig. 2C). Reflecting the reported mild  
164 inflammatory response elicited by AAVs, we did not observe significant changes in circulating total  
165 white blood cells, monocytes and neutrophils (Fig. 2D, 2E, Fig. S1B). We observed a significant

166 difference in circulating lymphocytes between AAV-Null day 4 and AAV-Cre day 7 groups (Fig. 2E). This  
167 did not translate to a significant change in the relative numbers of lymphocytes in these groups (Fig.  
168 S1B). Overall, we did not observe any impact on general health of mice a week after AAV-Null or AAV-  
169 Cre administration.

170

### 171 [AAV8-TBG vectors do not cause liver damage and do not affect liver function.](#)

172 Next, having demonstrated hepatocyte-specific targeting, we proceeded to assess the effects of  
173 AAV8-TBG on the liver specifically. Livers were normal macroscopically and we did not observe any  
174 changes in liver size or liver histology microscopically (as assessed by H&E staining) in response to  
175 AAV8 (Fig. 2F, S1C, S2). Similarly, serum levels of Alanine aminotransferase (ALT) and Alkaline  
176 phosphatase (ALP) (markers of liver necrosis and bile duct damage respectively) remained at baseline  
177 levels at every time point (Fig. 2G). Assessing liver function, serum bilirubin levels also remained  
178 unaffected as did serum levels of Total protein, Albumin, Globulin and Albumin:Globulin ratio (Fig 2G,  
179 S1D). Examining hepatic cell death in more detail, we performed immunohistochemistry for the  
180 apoptosis-specific marker Cleaved Caspase 3 (CC3). No changes in apoptotic cell death were observed  
181 at any time point (Fig. 2H). There was no change in serum urea levels, however creatinine was  
182 significantly increased in AAV-Null day 4 mice, returning to baseline at day 7 (Fig. S1E). Therefore, we  
183 found no evidence of liver damage or dysfunction after AAV8-TBG administration during the times  
184 when transduction and generic recombination occur.

185

186 We next examined intrahepatic leukocyte populations to test whether a demonstrable local  
187 immune response occurred in the liver. Using the pan-leukocyte marker CD45, we didn't observe any  
188 change in overall leukocyte numbers or distribution (Fig. 3A, S2). The use of more specific leukocyte  
189 markers for neutrophils (Ly6G), macrophages (F4/80), T-cells (CD3) and B-cells (B220) also  
190 demonstrated no significant differences in these populations either in number or distribution at any  
191 timepoint (Fig. 3A, S2, S3). Therefore we find no evidence of histological inflammation or inflammatory  
192 response to biologically relevant AAV8 dosing.

193

### 194 [AAV8-TBG vectors affect the cell cycle of liver cells and induce expression of the DNA 195 damage marker \$\gamma\$ H2AX in the liver.](#)

196 Viral infection of mammalian cells is, through a variety of well characterised mechanisms, known  
197 to affect several cellular processes including cell cycle, DNA damage response and the release of  
198 Damage-Associated Molecular Patterns (DAMPs) (Loo and Gale, 2011; Dou *et al.*, 2017; Motwani,  
199 Pesiridis and Fitzgerald, 2019). To address whether AAV8-TBG vectors can induce such changes, we

200 first stained liver sections for the cell cycle inhibitor *Cdkn1a* (P21) or for BrdU to determine changes in  
201 the cell cycle status of liver cells. Whilst there was no significant change in hepatic P21 at any timepoint  
202 in either group, there was a significant transient reduction of BrdU positive cells at day 2 post AAV8-  
203 *TBG* administration (Fig. 3B, 3C, S4). Next, we assessed the presence and extent of hepatic DNA  
204 damage by staining liver sections for the DNA damage marker  $\gamma$ H2AX. We observed a marked increase  
205 in  $\gamma$ H2AX at day 2, persisting until day 7, both in the AAV-Null and in the AAV-Cre groups (Fig. 3D, S4).  
206 Moreover, treatment with AAV-Cre resulted in a stronger  $\gamma$ H2AX response (Fig. S1F, S4). Notably,  
207  $\gamma$ H2AX staining was stronger in the pericentral hepatocytes (Fig. 3E). Our data reveal an acute but  
208 transient reduction in hepatic proliferation as well as an increase in hepatic  $\gamma$ H2AX following systemic  
209 AAV8 administration.

210

### 211 *AAV8-TBG* vectors induce circadian rhythm- and infection-related transcriptional 212 changes.

213 As a broader and unbiased assessment of AAV8-*TBG* vectors effects we next explored their  
214 effect on the liver transcriptome by performing RNA-seq on whole liver lysates from our AAV8-*TBG*-  
215 treated and uninjected control mice (Fig. 4A). In general, there was a strong degree of similarity among  
216 all samples by Principal Component Analysis (PCA) (Fig. 4B). We interrogated this transcriptomics data  
217 in more detail, starting with the AAV8-*TBG* cargo in each group. Here we observed that there was a  
218 gradual increase in the number of the respective AAV8-*TBG* transcripts detected from day 2 to day 7  
219 (Fig. 4C). Transcript number was also influenced by the specific cargo; expression of Cre transcript was  
220 lower than that of the transcript expressed by AAV-Null. Next, we performed pathway analysis in order  
221 to identify global transcriptional changes. This revealed two broad transcriptional programmes that  
222 were altered among the different timepoints; immune response-related changes and circadian rhythm  
223 changes (Fig. 4D). Notably, using this unbiased approach we did not observe any transcriptional  
224 changes associated with DNA damage response.

225

226 Having observed prominent effects on cellular proliferation at day 2, we focused on the  
227 circadian rhythm process that was specific for this timepoint. First, we validated the expression of  
228 specific genes involved in circadian rhythm (Takahashi, 2017) observing similar trends of expression to  
229 those of the RNA-seq (Fig. 4E, F). Similarly to the reduced proliferation at day 2, the changes in  
230 circadian rhythm were viral-specific rather than cargo-specific; the change was observed at a specific  
231 time point regardless of the cargo (Fig. 4F). Furthermore, some of the genes involved in these networks  
232 (*Wee1*, *Tef*) have been described to regulate cell cycle (Russell and Nurse, 1987; Rowley, Hudson and

233 Young, 1992; Yang *et al.*, 2019). Overall, our transcriptomic data reveals changes in genes involved in  
234 the circadian rhythm as well as in inflammation and immunity.

235

## 236 Discussion

237 AAV8-*TBG* vectors are an established means for hepatocyte-specific manipulation of gene  
238 expression *in vivo*. In this study we show that AAV8-*TBG* vectors have both a high degree of specificity  
239 and minimal off-target effects. Therefore, they serve as a reliable and efficient experimental tool. To  
240 our knowledge, our study is the first one to systematically examine these effects in the liver of WT  
241 mice. We demonstrate that mouse health is generally unaffected by AAV8-*TBG* vectors as the body  
242 and liver weights exhibited the expected growth. No inflammatory response, either systemic or  
243 intrahepatic, was observed and liver histology and function remained normal. However, we have  
244 identified some subtle phenotypes that are induced by AAV8-*TBG* vectors, which should be taken into  
245 account when using this system for *in vivo* experiments in mice. These observations highlight that  
246 AAV8-*TBG* vectors are not entirely benign.

247

248 The specific targeting of hepatocytes was demonstrated by 2 reporters, RFP and GFP.  
249 Importantly, even though there were a few labelled cells in extra-hepatic tissues in our study, AAV8-  
250 *TBG* vectors showed highly specific tropism for hepatocytes as previously reported (Wang *et al.*, 2010;  
251 Bell *et al.*, 2011). When considering phenotypic modification of cells, a low level of off-target  
252 recombination is unlikely to significantly affect short term studies, however it should be considered  
253 particularly when performing longer term experiments where modified cells may expand clonally.

254

255 We note differences in the labelling pattern between the 2 reporters; RFP evenly labelled almost  
256 all of the hepatocytes, while fluorescent intensity of GFP was more heterogeneous across zones,  
257 showing preference for the pericentral hepatocytes (Zone 3), but also among cells within the same  
258 zone. We suggest that this is explained by the different mechanisms of labelling. Expression of the  
259 tdTomato gene is endogenously regulated and protein expression depends on recombination  
260 following Cre expression by the AAV8-*TBG* vector; once Cre is expressed and the LSL cassette excised,  
261 there is continuous expression of RFP protein by the host genome. On the other hand, GFP is expressed  
262 directly from the AAV8-*TBG* vector. Therefore, its expression is predicted to vary from cell to cell  
263 depending on the quantity of viral copies delivered to each cell. The preferential labelling of pericentral  
264 hepatocytes by AAV8-*TBG*-GFP in mice has been demonstrated by others (Wang *et al.*, 2010; Bell *et al.*,  
265 2011) but the exact mechanism remains unclear. It has been reported that a stronger “pericentral  
266 tropism” of AAV8 may underlie this (Bell *et al.*, 2011), rather than differential expression of *TBG* across



267 the liver zones. This effect was also apparent by the zonal distribution of  $\gamma$ H2AX positivity. Here we  
268 also observed zonal differences which are further exacerbated by the expression of Cre recombinase,  
269 further supporting a zonal preponderance for higher tropism/expression of cargo in pericentral  
270 hepatocytes.

271

272 One of the key findings of this study is the widespread DNA damage response observed in the  
273 liver, as manifested by the increase in  $\gamma$ H2AX. It has been previously shown that AAVs can, upon  
274 infection, induce DNA damage and mobilize the DNA repair machinery of the host cell in order to  
275 achieve the circular episomal form in which AAVs persist in the host cell (Schwartz *et al.*, 2009; Cataldi  
276 and McCarty, 2013). These studies, mostly performed *in vitro*, identify DNA-PKcs as a key mediator of  
277 this process, with  $\gamma$ H2AX being one of the DNA damage response components involved. Our study  
278 confirms the increase of hepatocellular  $\gamma$ H2AX in mice *in vivo* in response to AAV-Null infection. The  
279 enhanced DNA damage response observed in the mice injected with AAV-Cre could be explained by  
280 additional, non-specific DNA damage induced by the Cre recombinase. This enzyme can unselectively  
281 cut DNA at non-Lox sites (Loonstra *et al.*, 2001; Janbandhu, Moik and Fässler, 2014; Pépin *et al.*, 2016;  
282 Lam *et al.*, 2019). Lastly, it is important to highlight that, in our study, in spite of the increase in hepatic  
283  $\gamma$ H2AX, there were no apparent changes in histology or gene expression related to DNA damage.

284

285 The observed decrease of proliferation on day 2 in both AAV-Null and AAV-Cre indicates that  
286 this is an AAV8-TBG mediated effect rather than solely one mediated by the Cre recombinase as has  
287 been described by others (Loonstra *et al.*, 2001). This reduction of proliferation is unlikely to be  
288 biologically significant in the longer term as it affects a small proportion of liver cells (a drop of 0.2  
289 percentile units compared to uninjected controls). Nonetheless, it is possible that the affected liver  
290 cells are important for specific functions, so further characterisation of this phenotype should be  
291 considered depending on the experimental question being tested. One transcriptional process that  
292 was altered in AAV8-TBG-treated mice was the circadian rhythm, with the changes taking place on day  
293 2. Circadian rhythm is classically viewed as an internal biological clock manifested by oscillations in  
294 gene expression and which is mainly affected by photoperiodism. The liver however has an additional  
295 autonomous internal clock and thus it is not entirely dependent on photoperiodism (Koronowski *et al.*  
296 *et al.*, 2019; Li *et al.*, 2020). Our transcriptomics analysis identified several genes involved in circadian  
297 rhythm that are differentially expressed at day 2. As some of these genes have been implicated in the  
298 control of cell cycle (Matsuo *et al.*, 2003; Zhou *et al.*, 2018), It is possible that these transcriptional  
299 changes are related to the mild decrease in hepatic proliferation we observed at day 2.

300

301 Our transcriptomics analysis of whole liver lysates revealed that AAV8-*TBG* vectors can induce  
302 transcriptional changes in the liver. The most prominent transcriptional changes identified in GO  
303 analysis are related to infection and inflammation processes and were observed in all the time points  
304 of the study. Given the viral nature of AAV8-*TBG* vectors, it is perhaps unsurprising to observe these  
305 transcriptional responses in the infected cells. However, in our hands, this transcriptional response to  
306 infection did not result in a demonstrable modification of the numbers of immune cells as a marker of  
307 inflammatory response. Nevertheless, these transcriptional changes should be considered in  
308 experiments with AAV8-*TBG*, especially when the focus of the study is related to the immune system  
309 and/or inflammation.

310

311 One limitation of our work is that we have not explored the longer term consequences of AAV8  
312 use in WT animals. We have observed long term hepatic expression of GFP following AAV8-*TBG*-GFP  
313 administration to animals for over 200 days (Valentin Barthet, personal communication). Persistent  
314 expression of AAV8-*TBG*-driven GFP in the liver suggests persistence of AAV8-*TBG* vectors in the  
315 hepatocytes. Therefore, it would be interesting to characterise the long term effects of AAV8-*TBG*  
316 vectors in mice.

317

318 In this study we describe the short term off-target effects of systemic administration of AAV8-  
319 *TBG* vectors in mice at a dose relevant for target delivery across the entire hepatocyte population.  
320 Although other studies have reported the some aspects of off-target effects of AAVs, these have  
321 mostly been performed *in vitro* and only explored specific hypothesis driven effects. In our study, the  
322 use of WT C57BL/6J mice to map the AAV8-*TBG* off-target effects, both systemic and liver-specific,  
323 makes our data relevant to that of other researchers. Additionally, the unbiased transcriptomics  
324 analysis serves to generally reassure about a lack of major off-target effects within hepatocytes when  
325 using this vector system, whilst acting as a useful tool for other researchers. In conclusion, our data  
326 show that AAV8-*TBG* vectors are a reliable and efficient tool for hepatocyte-specific genetic  
327 manipulation with minimal off-target effects.

328

## 329 [Materials and Methods](#)

### 330 [Animal experiments](#)

331 9-10 weeks old male C57BL/6J WT mice (*Mus musculus*) were purchased from Charles River  
332 UK. To minimise biological variability we obtained mice from as few litters as possible. The mice were  
333 housed in cages of 4-5 mice/cage in a licensed, specific pathogen-free environment facility under  
334 standard conditions with a 12 hr day/night cycle and ad libitum access to food and water. All

335 experiments were carried out with ethical permission from the Animal Welfare and Ethical Review  
336 Body (AWERB) and in accordance with the ARRIVE guidelines (du Sert *et al.*, 2020) and the Home  
337 Office guidelines (UK licence 70/8891; protocol 2).

338

339 AAV8 experimentation was performed as previously described (Bird *et al.*, 2018). Briefly, stock  
340 AAV8.TBG.PI.Cre.rBG (AAV8-TBG-Cre) (Addgene, 107787-AAV8) or AAV8.TBG.PI.Null.bGH (AAV8-TBG-  
341 Null) (Addgene, 105536-AAV8) (stored at -80 °C) was thawed on ice, diluted in sterile PBS to achieve a  
342 working titre of  $2 \times 10^{12}$  genetic copies (GC)/ml and was subsequently stored at -20 °C until usage. On  
343 the day of the injection the diluted AAV was thawed and each mouse was injected via the tail vein with  
344 100µl ( $2 \times 10^{11}$  GC/mouse; mice in this study weighed from 22.4 – 29.4g at the time of injection). This  
345 dose has been previously shown to result in genetic recombination of nearly the total hepatocyte  
346 population (Bird *et al.*, 2018). All mice were weighed on injection day (day 0) and on their respective  
347 cull day. Changes in body weight were compared to published data for this mouse strain (The Jackson  
348 Laboratory, Body Weight Chart #000664, URL (accessed on 26/11/2020): [https://www.jax.org/jax-](https://www.jax.org/jax-mice-and-services/strain-data-sheet-pages/body-weight-chart-000664#)  
349 [mice-and-services/strain-data-sheet-pages/body-weight-chart-000664#](https://www.jax.org/jax-mice-and-services/strain-data-sheet-pages/body-weight-chart-000664#)). The mice were sacrificed 2,  
350 4 or 7 days post AAV8 administration. Male C57BL/6J mice from the same batch and of the same age  
351 without AAV8 administration (uninjected controls) served as baseline controls. All mice were culled  
352 between the hours of 11:00 and 15:00 on the day of harvest. All mice were injected with BrdU  
353 (Amersham, RPN201, 250µl per mouse) intraperitoneally 2 hrs before culling.

354

355 For the confirmation of tissue specificity of AAV8 we used 8-12 weeks old male mice on a  
356 C57BL/6 background that were homogygotes for the R26RLSL-tdTomato allele (LSL-RFP) (Madisen *et al.*,  
357 2010). These mice were injected on the same day with both AAV8-TBG-Cre and  
358 AAV8.TBG.PI.eGFP.WPRE.bGH (AAV8-TBG-GFP) (Addgene, 105535-AAV8), both at a dose of  $2 \times 10^{11}$   
359 GC/mouse as described above. These mice were culled 7 days post AAV administration. LSL-RFP mice  
360 that were injected with  $2 \times 10^{11}$  GC of AAV8-TBG-Null and culled 7 days later served as controls for RFP  
361 expression.

362

363 Mice were euthanized by CO<sub>2</sub> inhalation and their blood was collected immediately by cardiac  
364 puncture into EDTA-coated tubes (Sarstedt) for haematology or into lithium heparin-coated tubes  
365 (Sarstedt) for plasma biochemistry (plasma separation was performed by centrifugation at 2350g for  
366 10 mins at room temperature, within 2 hours post-harvest). Mouse weights and liver weights were  
367 recorded post mortem. The caudate lobe of the liver was immediately frozen in liquid nitrogen, the

368 left median lobe was frozen on dry ice and the rest of the liver was fixed for 24 hours in 10% neutral  
369 buffered formalin (in PBS), then changed to 70% ethanol before embedding.

370

371 As these are observational studies, power calculations were not routinely performed;  
372 however, animal numbers were chosen to reflect the expected magnitude of response taking into  
373 account the variability observed in pilot experiments and previous experience transcriptomic  
374 analyses. For all experiments the number of biological replicates  $\geq 3$  mice per cohort.

375

### 376 Haematology and plasma biochemistry analysis

377 Whole blood haematology was performed using an IDEXX ProCyte Dx analyzer on whole blood  
378 collected in EDTA-coated tubes (Sarstedt). Biochemical analysis of plasma was carried out using a  
379 Siemens Dimension Xpand Clinical Chemistry Analyzer following International Federation of Clinical  
380 Chemistry (IFCC) approved methods.

381

### 382 Histology

383 4 $\mu$ m tissue sections underwent antigen retrieval and then sequentially incubated with the  
384 primary and secondary antibody. Detection was performed with 3,3'-Diaminobenzidine and the  
385 sections were counterstained with Haematoxylin Z. Details about the antibodies and reagents can be  
386 found in Fig. S5.

387

388 Images were obtained on a Zeiss Axiovert 200 microscope using a Zeiss AxioCam MRc camera.  
389 For image analysis, stained slides were scanned using a Leica Aperio AT2 slide scanner (Leica  
390 Microsystems, UK) at 20x magnification. Quantification of blinded stained histologic sections was  
391 performed using the HALO image analysis software (V3.1.1076.363, Indica Labs). All of the slides were  
392 stained for a specific antibody in the same batch and processed at the same time in an autostainer,  
393 strictly keeping all incubation times (including that of DAB development) the same for all the samples.

394

395 For multiplex immunofluorescence, 4 $\mu$ m liver sections were retrieved for 25 minutes in Citrate  
396 buffer (pH 6) and were incubated with antibodies against GFP (Abcam, ab13970, 1:500), RFP  
397 (Rockland, 600-401-379, 1:200) and HNF4a (Santa Cruz, sc6556, 1:40) overnight at 4 °C. This was  
398 followed by incubation with the secondary antibodies and DAPI (1 $\mu$ g/ $\mu$ l, 0100-20, SouthernBiotech)  
399 for 1 hour at room temperature. Images were obtained using a Zeiss 710 upright confocal Z6008  
400 microscope.

401

## 402 RNA extraction

403 RNA extraction was performed using the Qiagen RNeasy kit (74104, Qiagen UK) as per the  
404 manufacturer's instructions, including the optional DNase I step. Snap frozen caudate lobe (20-30mg)  
405 was homogenized using the Precellys Evolution homogenizer (Cat. Number P000062-PEVO0-A, "MET"  
406 programme) in 600µl buffer RLT/1% β-mercaptoethanol in Precellys lysing kit tubes CK14 (Precellys,  
407 P000912-LYSKO-A.0). The RNA was eluted in 30µl RNase-free water. RNA integrity and concentration  
408 were confirmed by agarose gel electrophoresis and by using the Nanodrop 2000 (Thermo Fisher  
409 Scientific) respectively. All samples had a 260/280 ratio  $\geq 2$ .

410

## 411 Quantitative reverse transcription PCR (RT-qPCR)

412 For RT-qPCR, RNA was extracted as described above. cDNA was generated from 1µg of RNA  
413 using the Qiagen QuantiTect Reverse transcription Kit (205313, Qiagen UK) on a PTC-200 thermal  
414 cycler (MJ Research) according to the manufacturer's instructions. Omission of Reverse Transcriptase  
415 and a template-free reaction were used as negative controls. Quantitative real time PCR was  
416 performed with the SYBR Green system (204145, Qiagen UK) and using primers from Qiagen targeting  
417 *Per1* (QT00113337), *Per3* (QT00133455) or *Wee1* (QT00157696) using a QuantStudio 5 Real time PCR  
418 system (Thermo Fisher Scientific, A28140) in a 384 well plate setting (final reaction volume 10µl per  
419 well). Each biological replicate (mouse) was run in triplicate and 18S ribosomal RNA (Rn18S, Qiagen,  
420 QT02448075) was used as a house keeping gene for normalization.

421

## 422 RNA-seq analysis

423 Purified RNA was tested on an Agilent 2200 TapeStation (D1000 screentape) using RNA  
424 screentape and samples with a RIN value greater than 7 were further processed for library preparation.  
425 RNA at a concentration of 20ng/µl (1µg RNA in 50µl RNase-free water) was used to prepare libraries  
426 using the TruSeq Stranded mRNA Kit. Agilent 2200 TapeStation was used to check the quality of the  
427 libraries and Qubit (Thermo Fisher Scientific) was used to assess library quantity. The libraries were  
428 then run on the Illumina NextSeq 500 using the High Output 75 cycles kit (single end, 1x75 cycle, dual  
429 index).

430

431 Raw BCL files were converted to FASTQ files using bcl2fastq2-v2.19.1 and were aligned to the  
432 mouse genome (GRCm38) using Hisat2 (v 2.1.0) and raw counts were generated using featureCounts  
433 and the GRCm38 Gencode annotation v 84. Differential gene expression was performed using edgeR.  
434 All RNA-seq analysis graphs were generated using standard R packages. Gene ontology was performed

435 using g:Profiler (Raudvere *et al.*, 2019). The raw data can be found on the Gene Expression Omnibus  
436 (GEO) repository: GSE165651.

437

## 438 Statistical analyses

439 Statistical analyses were performed using the Prism 9 Software (GraphPad Software, Inc.). The  
440 Shapiro-Wilk test was used to assess whether data were normally distributed. For normally distributed  
441 data, either One-way ANOVA, 2-way ANOVA or the Brown-Forsythe and Welch ANOVA test was used.  
442 The Kruskal-Wallis test was performed for non parametric data. All figures were created using the  
443 Scribus Software (v1.4.7, G.N.U. general public licence). All data points on graphs represent biological  
444 replicates (each data point represents one mouse), bars represent mean  $\pm$  Standard Error of Mean  
445 (S.E.M.) and P values are: \*P < 0.05; \*\*P < 0.01; \*\*\*P < 0.001 and \*\*\*\*P < 0.0001.

446

## 447 Author contributions

448 CK contributed to the conceptualisation of the project, designed and performed animal studies,  
449 performed experiments, analysed data, made the figures and wrote the manuscript (original draft and  
450 subsequent editing). AW assisted with the methodology of the animal studies, performed the curation  
451 and analysis of the transcriptomics data and contributed to figure generation. CN performed the  
452 immunohistochemistry stainings. WC performed the RNA sequencing (RNA-seq). SM performed  
453 animal experiments. TGB contributed to the conceptualisation of the project, assisted with data  
454 analysis and figure generation, edited the original draft, provided resources and acquired funding. All  
455 authors contributed to the drafting and editing of the manuscript.

456

## 457 Acknowledgements

458 CK, AW, CN, WC and SM were funded by Cancer Research UK (Grant number: A17196). TGB was  
459 funded by the Wellcome Trust (Grant number: WT107492Z). We would like to thank the CRUK Beatson  
460 Institute's histological services, biological services and molecular technology and bioinformatics  
461 services, central services as well as the Veterinary Clinical Pathology Lab (University of Glasgow) for  
462 their help.

463

## 464 References

465 Bell, P. *et al.* (2011) 'Inverse zonation of hepatocyte transduction with AAV vectors between mice  
466 and non-human primates', *Molecular Genetics and Metabolism*, 104(3), pp. 395–403. doi:

- 467 10.1016/j.ymgme.2011.06.002.
- 468 Bird, T. G. *et al.* (2018) 'TGF $\beta$  inhibition restores a regenerative response in acute liver injury by  
469 suppressing paracrine senescence', *Science Translational Medicine*, 10(454). doi:  
470 10.1126/scitranslmed.aan1230.
- 471 Boutin, S. *et al.* (2010) 'Prevalence of serum IgG and neutralizing factors against adeno-associated  
472 virus (AAV) types 1, 2, 5, 6, 8, and 9 in the healthy population: Implications for gene therapy using  
473 AAV vectors', *Human Gene Therapy*, 21(6), pp. 704–712. doi: 10.1089/hum.2009.182.
- 474 Calcedo, R. *et al.* (2011) 'Adeno-associated virus antibody profiles in newborns, children, and  
475 adolescents', *Clinical and Vaccine Immunology*, 18(9), pp. 1586–1588. doi: 10.1128/CI.05107-11.
- 476 Cataldi, M. P. and McCarty, D. M. (2013) 'Hairpin-end conformation of adeno-associated virus  
477 genome determines interactions with DNA-repair pathways', *Gene Therapy*, 20(6), pp. 686–693. doi:  
478 10.1038/gt.2012.86.
- 479 Dou, Z. *et al.* (2017) 'Cytoplasmic chromatin triggers inflammation in senescence and cancer.',  
480 *Nature*, 550(7676), pp. 402–406. doi: 10.1038/nature24050.
- 481 Duan, D. *et al.* (1999) 'Circular Intermediates of Recombinant Adeno-Associated Virus Have Defined  
482 Structural Characteristics Responsible for Long-Term Episomal Persistence in Muscle Tissue', *Journal*  
483 *of Virology*, 73(1), pp. 861–861. doi: 10.1128/jvi.73.1.861-861.1999.
- 484 Gao, F. F. *et al.* (2016) 'Tamoxifen induces hepatotoxicity and changes to hepatocyte morphology at  
485 the early stage of endocrinotherapy in mice', *Biomedical Reports*, 4(1), pp. 102–106. doi:  
486 10.3892/br.2015.536.
- 487 Gay, D. M. *et al.* (2019) 'Loss of BCL9/9l suppresses Wnt driven tumourigenesis in models that  
488 recapitulate human cancer', *Nature Communications*, 10(1), pp. 1–16. doi: 10.1038/s41467-019-  
489 08586-3.
- 490 Janbandhu, V. C., Moik, D. and Fässler, R. (2014) 'Cre recombinase induces DNA damage and  
491 tetraploidy in the absence of LoxP sites', *Cell Cycle*, 13(3), pp. 462–470. doi: 10.4161/cc.27271.
- 492 Keeley, T. M., Horita, N. and Samuelson, L. C. (2019) 'Tamoxifen-Induced Gastric Injury: Effects of  
493 Dose and Method of Administration', *Cmgh*, 8(3), pp. 365–367. doi: 10.1016/j.jcmgh.2019.06.007.
- 494 Kellendonk, C. *et al.* (2000) 'Hepatocyte-specific expression of Cre recombinase', *genesis*, 26(2), pp.  
495 151–153. doi: 10.1002/(SICI)1526-968X(200002)26:2<151::AID-GENE17>3.0.CO;2-E.
- 496 Koronowski, K. B. *et al.* (2019) 'Defining the Independence of the Liver Circadian Clock', *Cell*, 177(6),  
497 pp. 1448-1462.e14. doi: 10.1016/j.cell.2019.04.025.
- 498 Lam, P. T. *et al.* (2019) 'Considerations for the use of Cre recombinase for conditional gene deletion  
499 in the mouse lens', *Human genomics*, 13(1), p. 10. doi: 10.1186/s40246-019-0192-8.
- 500 Lee, H., Yoon, D. E. and Kim, K. (2020) 'Genome editing methods in animal models', *Animal Cells and*

- 501 *Systems*, 24(1), pp. 8–16. doi: 10.1080/19768354.2020.1726462.
- 502 Lee, S. *et al.* (2020) 'Adeno-associated virus serotype 8-mediated genetic labeling of cholangiocytes  
503 in the neonatal murine liver', *Pharmaceutics*, 12(4). doi: 10.3390/pharmaceutics12040351.
- 504 Li, H. *et al.* (2020) 'Endogenous circadian time genes expressions in the liver of mice under constant  
505 darkness', *BMC Genomics*, 21(1), pp. 1–12. doi: 10.1186/s12864-020-6639-4.
- 506 Li, H., Malani, N. and Hamilton, S. R. (2011) 'Assessing the potential for AAV vector genotoxicity in a  
507 murine model (Blood (2011) 117, 12, (3311-3319))', *Blood*, 117(24), p. 6739. doi: 10.1182/blood-  
508 2011-04-347757.
- 509 Loo, Y. M. and Gale, M. (2011) 'Immune Signaling by RIG-I-like Receptors', *Immunity*, 34(5), pp. 680–  
510 692. doi: 10.1016/j.immuni.2011.05.003.
- 511 Loonstra, A. *et al.* (2001) 'Growth inhibition and DNA damage induced by Cre recombinase in  
512 mammalian cells', *Proceedings of the National Academy of Sciences of the United States of America*,  
513 98(16), pp. 9209–9214. doi: 10.1073/pnas.161269798.
- 514 Lundin, A. *et al.* (2020) 'Development of an ObLiGaRe Doxycycline Inducible Cas9 system for pre-  
515 clinical cancer drug discovery', *Nature Communications*, 11(1), pp. 1–16. doi: 10.1038/s41467-020-  
516 18548-9.
- 517 Madisen, L. *et al.* (2010) 'A robust and high-throughput Cre reporting and characterization system for  
518 the whole mouse brain', *Nature Neuroscience*, 13(1), pp. 133–140. doi: 10.1038/nn.2467.
- 519 Malato, Y. *et al.* (2011) 'Fate tracing of mature hepatocytes in mouse liver homeostasis and  
520 regeneration', *Journal of Clinical Investigation*, 121(12), pp. 4850–4860. doi: 10.1172/JCI59261.
- 521 Matsuo, T. *et al.* (2003) 'Control mechanism of the circadian clock for timing of cell division in vivo',  
522 *Science*, 302(5643), pp. 255–259. doi: 10.1126/science.1086271.
- 523 Mendell, J. R. *et al.* (2010) 'Dystrophin Immunity in Duchenne's Muscular Dystrophy', *New England*  
524 *Journal of Medicine*, 363(15), pp. 1429–1437. doi: 10.1056/nejmoa1000228.
- 525 Miller, D. G., Petek, L. M. and Russell, D. W. (2004) 'Adeno-associated virus vectors integrate at  
526 chromosome breakage sites', *Nature Genetics*, 36(7), pp. 767–773. doi: 10.1038/ng1380.
- 527 Motwani, M., Pesiridis, S. and Fitzgerald, K. A. (2019) 'DNA sensing by the cGAS–STING pathway in  
528 health and disease', *Nature Reviews Genetics*, 20(11), pp. 657–674. doi: 10.1038/s41576-019-0151-1.
- 529 Müller, M., Bird, T. G. and Nault, J. C. (2020) 'The landscape of gene mutations in cirrhosis and  
530 hepatocellular carcinoma', *Journal of Hepatology*, 72(5), pp. 990–1002. doi:  
531 10.1016/j.jhep.2020.01.019.
- 532 Nakai, H. *et al.* (2005) 'Unrestricted Hepatocyte Transduction with Adeno-Associated Virus Serotype  
533 8 Vectors in Mice', *Journal of Virology*, 79(1), pp. 214–224. doi: 10.1128/jvi.79.1.214-224.2005.
- 534 Nault, J. C. *et al.* (2015) 'Recurrent AAV2-related insertional mutagenesis in human hepatocellular



- 535 carcinomas', *Nature Genetics*, 47(10), pp. 1187–1193. doi: 10.1038/ng.3389.
- 536 Pépin, G. *et al.* (2016) 'Cre-dependent DNA recombination activates a STING-dependent innate  
537 immune response', *Nucleic Acids Research*, 44(11), pp. 5356–5364. doi: 10.1093/nar/gkw405.
- 538 Rabinowitz, J., Chan, Y. K. and Samulski, R. J. (2019) 'Adeno-associated Virus (AAV) versus immune  
539 response', *Viruses*, 11(2), pp. 1–11. doi: 10.3390/v11020102.
- 540 Raudvere, U. *et al.* (2019) 'G:Profiler: A web server for functional enrichment analysis and  
541 conversions of gene lists (2019 update)', *Nucleic Acids Research*, 47(W1), pp. W191–W198. doi:  
542 10.1093/nar/gkz369.
- 543 Raven, A. *et al.* (2017) 'Cholangiocytes act as facultative liver stem cells during impaired hepatocyte  
544 regeneration', *Nature*, 547(7663), pp. 350–354. doi: 10.1038/nature23015.
- 545 Rogers, G. L. *et al.* (2011) 'Innate immune responses to AAV vectors', *Frontiers in Microbiology*,  
546 2(SEP), pp. 1–10. doi: 10.3389/fmicb.2011.00194.
- 547 Rosenthal, N. and Brown, S. (2007) 'The mouse ascending: Perspectives for human-disease models',  
548 *Nature Cell Biology*, 9(9), pp. 993–999. doi: 10.1038/ncb437.
- 549 Rowley, R., Hudson, J. and Young, P. G. (1992) 'The wee1 protein kinase is required for radiation-  
550 induced mitotic delay', *Nature*, 356(6367), pp. 353–355. doi: 10.1038/356353a0.
- 551 Russell, P. and Nurse, P. (1987) 'Negative regulation of mitosis by wee1+, a gene encoding a protein  
552 kinase homolog', *Cell*, 49(4), pp. 559–567. doi: 10.1016/0092-8674(87)90458-2.
- 553 Sauer, B. and Henderson, N. (1988) 'Site-specific DNA recombination in mammalian cells by the Cre  
554 recombinase of bacteriophage P1.', *Proceedings of the National Academy of Sciences of the United  
555 States of America*, 85(14), pp. 5166–5170. doi: 10.1073/pnas.85.14.5166.
- 556 Schwartz, R. A. *et al.* (2009) 'Adeno-Associated Virus Replication Induces a DNA Damage Response  
557 Coordinated by DNA-Dependent Protein Kinase', *Journal of Virology*, 83(12), pp. 6269–6278. doi:  
558 10.1128/jvi.00318-09.
- 559 du Sert, N. P. *et al.* (2020) 'The arrive guidelines 2.0: Updated guidelines for reporting animal  
560 research', *PLoS Biology*, 18(7), pp. 1–12. doi: 10.1371/journal.pbio.3000410.
- 561 Smith, K. *et al.* (2011) 'Adenovirus-Associated Virus Vector–Mediated Gene Transfer in Hemophilia  
562 B'. Available at: <https://www.nejm.org/doi/full/10.1056/nejmoa1108046>.
- 563 Takahashi, J. S. (2017) 'Transcriptional architecture of the mammalian circadian clock', *Nature  
564 Reviews Genetics*, 18(3), pp. 164–179. doi: 10.1038/nrg.2016.150.
- 565 Wang, L. *et al.* (2010) 'Systematic evaluation of AAV vectors for liver directed gene transfer in murine  
566 models', *Molecular Therapy*, 18(1), pp. 118–125. doi: 10.1038/mt.2009.246.
- 567 Wilson, J. M. (1996) 'Perspectives series: Molecular medicine in genetically engineered animals.  
568 Animal models of human disease for gene therapy', *Journal of Clinical Investigation*, 97(5), pp. 1138–

569 1141. doi: 10.1172/jci118527.

570 Yang, J. *et al.* (2019) 'Thyrotroph embryonic factor is downregulated in bladder cancer and  
571 suppresses proliferation and tumorigenesis via the AKT/FOXOs signalling pathway', *Cell Proliferation*,  
572 52(2). doi: 10.1111/cpr.12560.

573 Zhou, L. *et al.* (2018) 'Cry 1 regulates the clock gene network and promotes proliferation and  
574 migration via the Akt/P53/P21 pathway in human osteosarcoma cells', *Journal of Cancer*, 9(14), pp.  
575 2480–2491. doi: 10.7150/jca.25213.

576 Zincarelli, C. *et al.* (2008) 'Analysis of AAV serotypes 1-9 mediated gene expression and tropism in  
577 mice after systemic injection', *Molecular Therapy*, 16(6), pp. 1073–1080. doi: 10.1038/mt.2008.76.

578

579

## 580 Figure legends

### 581 Figure 1: AAV8-*TBG* vectors specifically target the hepatocytes.

582 (A) Schematic of the experimental design; 8-12 week old male LSL-RFP mice on a C57BL/6  
583 background (n=6) were i.v. injected with AAV-Cre and AAV-GFP at the same dose ( $2 \times 10^{11}$  GC/mouse).  
584 LSL-RFP mice (n=4) injected with AAV-Null served as controls. 7 days later their livers were harvested  
585 for analysis. (B) Representative images from liver sections stained for DAPI (blue), GFP (green), RFP  
586 (yellow) and the hepatocyte-specific marker HNF4 $\alpha$  (magenta), showing the hepatocellular specificity  
587 of the AAV8-*TBG* vectors. Arrows highlight the unlabelled bile ducts. CV = Central Vein; PV = Portal  
588 Vein. (C) Representative images of GFP immunohistochemistry in the pancreas, duodenum, kidney,  
589 heart, lung and spleen of mice injected with AAV-Cre and AAV-GFP. The inset images are from GFP-  
590 stained liver sections from uninjected WT mice (i.e. mice not injected with either AAV-Cre or AAV-GFP,  
591 representative images from n=3 mice). Arrows highlight GFP-positive cells (D) Immunohistochemistry  
592 for RFP in the kidney, pancreas, spleen, heart, lung and duodenum of the mice described in 1A. Arrows  
593 highlight RFP-positive cells. All scale bars are 50 $\mu$ m.

594

### 595 Figure 2: Systemic administration of AAV8-*TBG* has minimal effects on general health 596 causing neither liver injury nor impaired liver function.

597 (A) Schematic of experimental outline. Male C57BL/6J WT mice (n=46) were injected i.v. with  
598 either AAV-Null or AAV-Cre. Uninjected control mice (n=6) from the same stock were culled on the day  
599 that the rest of the mice were injected with AAV8-*TBG* (day 0). The injected mice were culled 2 (n=12;  
600 6 AAV-Null and 6 AAV-Cre), 4 (n=16; 8 AAV-Null and 8 AAV-Cre) or 7 (n=18; 9 AAV-Null and 9 AAV-Cre)  
601 days after injection. (B) Body weight (BW) at cull in relation to body weight at day 0 for the mice

602 described in 2A (each data point represents 1 mouse). Kruskal-Wallis test showed no statistically  
603 significant differences. **(C)** Haematocrit (HCT), Red Blood Cell (RBC) and Platelet (PLT) counts for  
604 uninjected, AAV-Null and AAV-Cre mice. One-way ANOVA showed no statistically significant  
605 differences. **(D)** Circulating White Blood Cell (WBC) counts for uninjected, AAV-Null and AAV-Cre mice.  
606 Kruskal-Wallis test. **(E)** Absolute blood counts of circulating Neutrophils (NEUT#), Monocytes (MONO#)  
607 and Lymphocytes (LYMPH#) for uninjected, AAV-Null and AAV-Cre mice.  $P = * < 0.05$ , one-way ANOVA.  
608 **(F)** Liver weight to body weight ratio (LW:BW) of uninjected, AAV-Null and AAV-Cre mice. One-way  
609 ANOVA showed no statistically significant differences. **(G)** Alanine aminotransferase (ALT), Alkaline  
610 phosphatase (ALP) and Total Bilirubin (TB) in the plasma of uninjected, AAV-Null and AAV-Cre mice.  
611 One-way ANOVA (for ALT) or Kruskal-Wallis test (for ALP and Bilirubin) showed no statistically  
612 significant differences. **(H)** Area quantification for Cleaved Caspase 3 (CC3) and P21 (representative  
613 images in Fig. S2). Kruskal-Wallis test showed no statistically significant differences. The bars on all  
614 graphs are mean  $\pm$  S.E.M.

615

616 **Figure 3: AAV8-TBG vectors affect the hepatocellular cell cycle and result in a DNA**  
617 **damage response.**

618 **(A)** Quantification of hepatic CD45, CD3, B220, F4/80 and Ly6G based on positive area/total liver  
619 area (CD45, F4/80, Ly6G) or positive cells as a percentage of total cells (CD3, B220) after  
620 immunohistochemical detection (representative images for each time point in Fig. S2, S3). One-way  
621 ANOVA (CD3), Kruskal-Wallis test (CD45 and Ly6G) or Brown-Forsythe and Welch ANOVA (B220 and  
622 F4/80) showed no statistically significant differences. **(B)** Quantification of hepatic P21 positive cells  
623 presented after immunohistochemical detection (representative images for each time point in Fig. S4).  
624 Brown-Forsythe and Welch ANOVA showed no statistically significant differences. **(C)** Quantification  
625 of liver cells positive for the S-phase marker BrdU and representative immunohistochemistry images  
626 (additional images for each time point are shown in Fig. S4); one-way ANOVA;  $P = * < 0.05$ ,  $** < 0.01$ . **(D)**  
627 Quantification of  $\gamma$ H2AX positive liver cells and representative immunohistochemistry images  
628 (additional images for each time point are shown in Fig. S4); Brown-Forsythe and Welch ANOVA;  $P =$   
629  $* < 0.05$ ,  $** < 0.01$ . **(E)** Representative liver section stained for  $\gamma$ H2AX showing zonal staining particularly  
630 in the pericentral area (Zone 3). CV = Central vein, PV = Portal vein. For all graphs  $n=4$  in all groups  
631 apart from AAV-Null d7 and AAV-Cre d7 where  $n=5$ . The bars on all graphs are mean  $\pm$  S.E.M and all  
632 scale bars are 50 $\mu$ m.

633

634 **Figure 4: Short-term temporal effects of AAV8-TBG upon the liver transcriptome.**

635 **(A)** Schematic of the samples used for RNA-seq. Whole liver lysates from 4 uninjected, 13 AAV-  
636 Null (n=4 at day 2, n=4 at day 4 and n=5 at day 7 post injection) and 11 AAV-Cre (n=4 at day 2, n=4 at  
637 day 4 and n=3 at day 7 post injection) mice were used. **(B)** Principal Component Analysis (PCA) plot of  
638 the samples used for RNA-seq. **(C)** Quantity of the transcripts encoded by AAV-Cre (sequence of the  
639 Cre recombinase) or AAV-Null (scrambled sequence) in the different conditions represented as  
640 Fragments Per Kilobase of transcript per Million mapped reads (FPKMs). 2-way ANOVA. \*P < 0.05;  
641 \*\*\*\*P < 0.0001. **(D)** Gene Ontology (GO) analysis comparing the differentially expressed genes shared  
642 between AAV-Null and AAV-Cre mice after each group is compared to uninjected mice (AAV-Null VS  
643 uninjected  $\cap$  AAV-Cre VS uninjected) mice at day 2, 4 and 7. **(E)** RT-qPCR for Per1, Per3 and Wee1. Fold  
644 change expression was calculated by normalizing to the uninjected mice for each gene. n=4 for each  
645 group. Kruskal-Wallis test (Per1) or one-way ANOVA (Per3, Wee1). \*P < 0.05; \*\*P < 0.01; \*\*\*P < 0.001  
646 and \*\*\*\*P < 0.0001. The bars are mean  $\pm$  S.E.M. **(F)** Unsupervised heatmap showing the differential  
647 expression of major genes involved in circadian rhythm regulation.

**Figure 1**

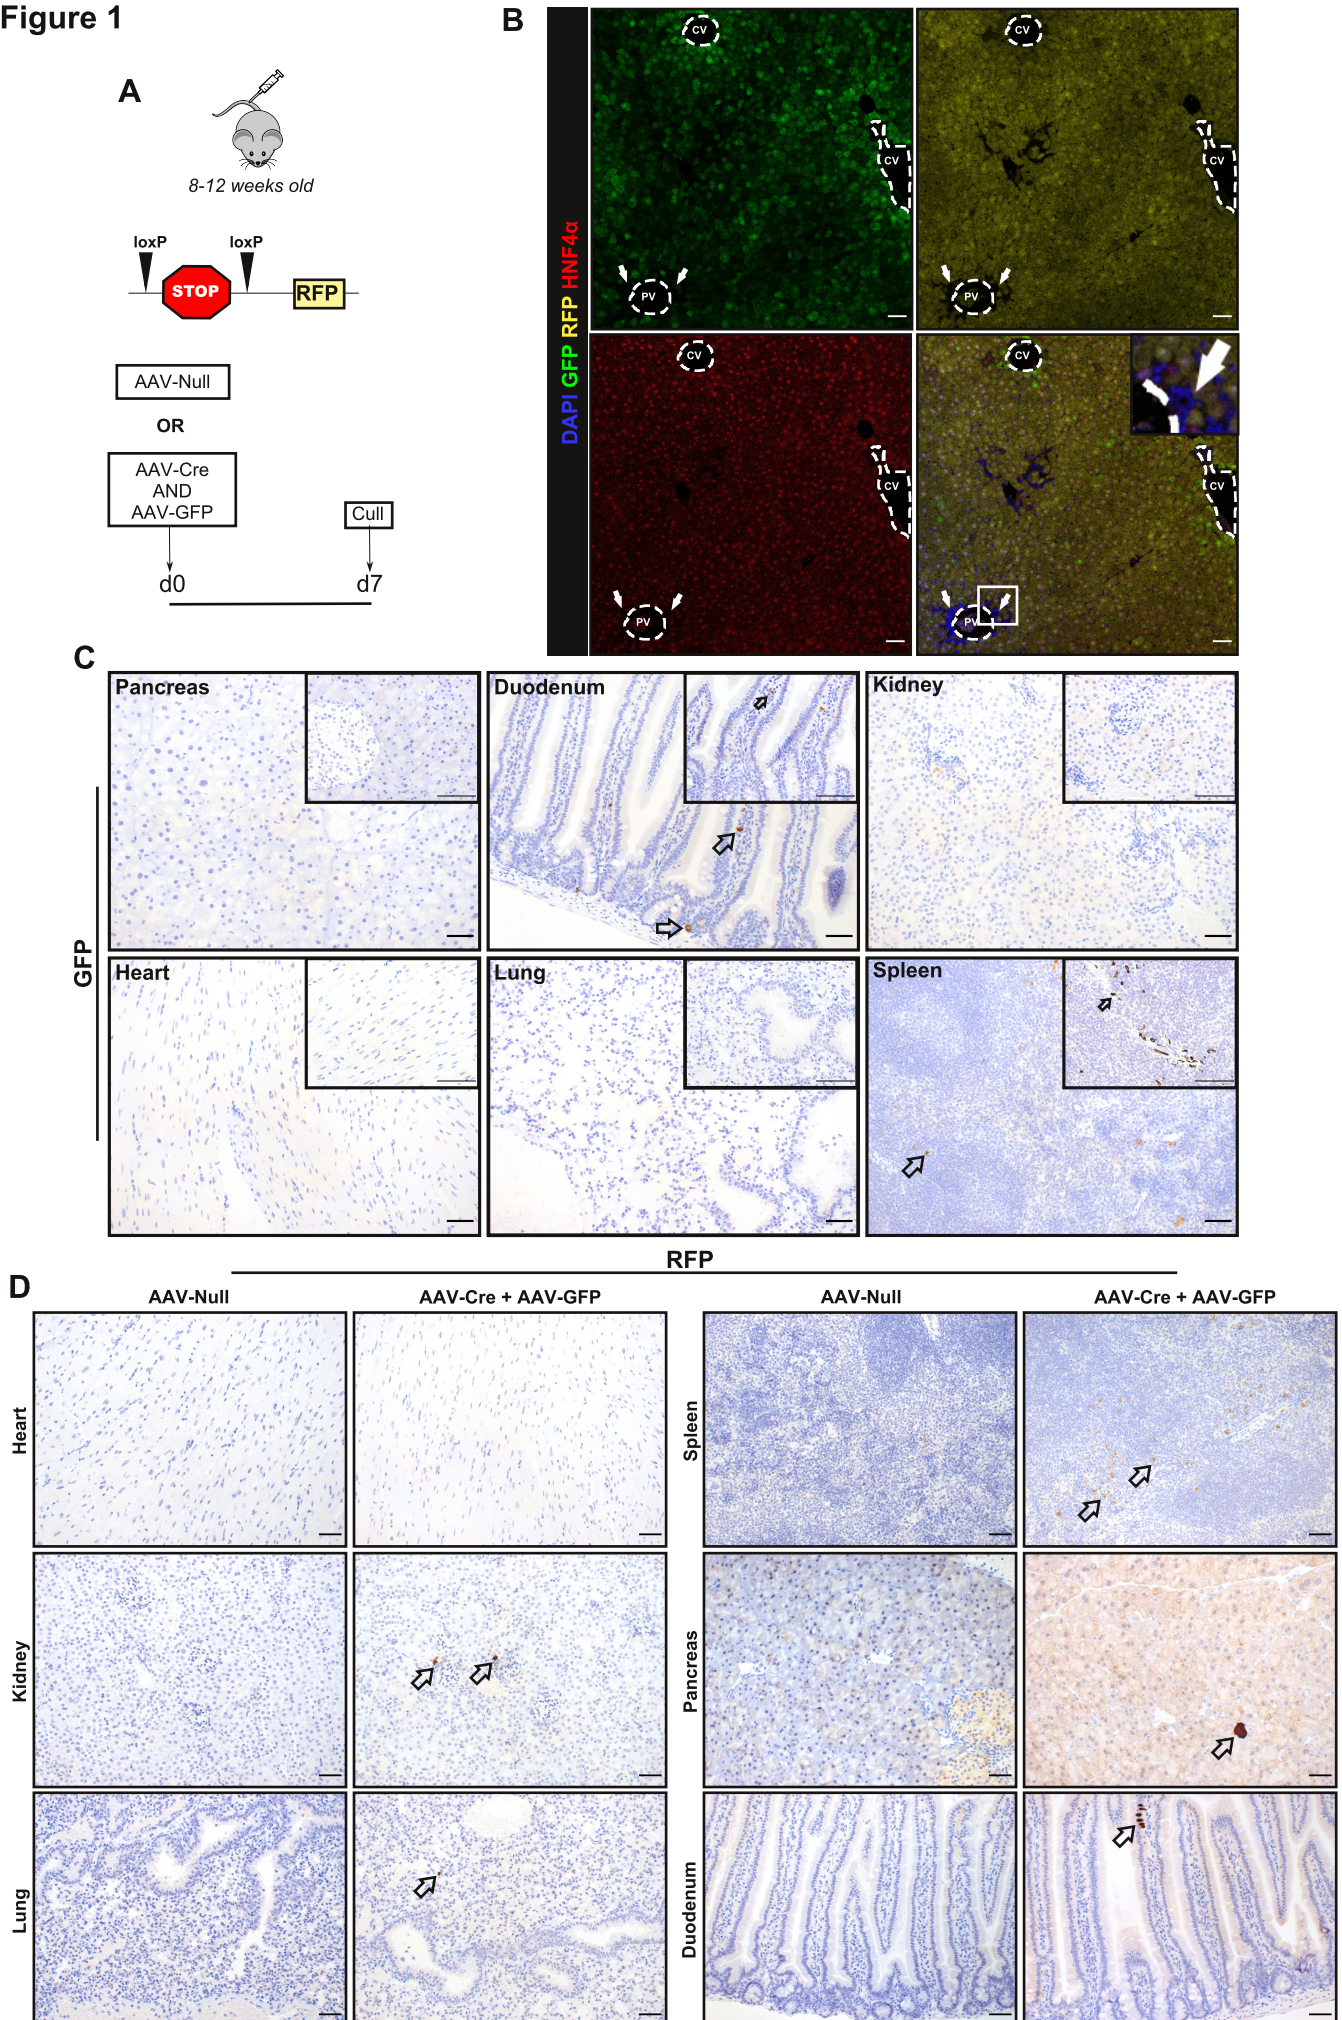

**Figure 2**

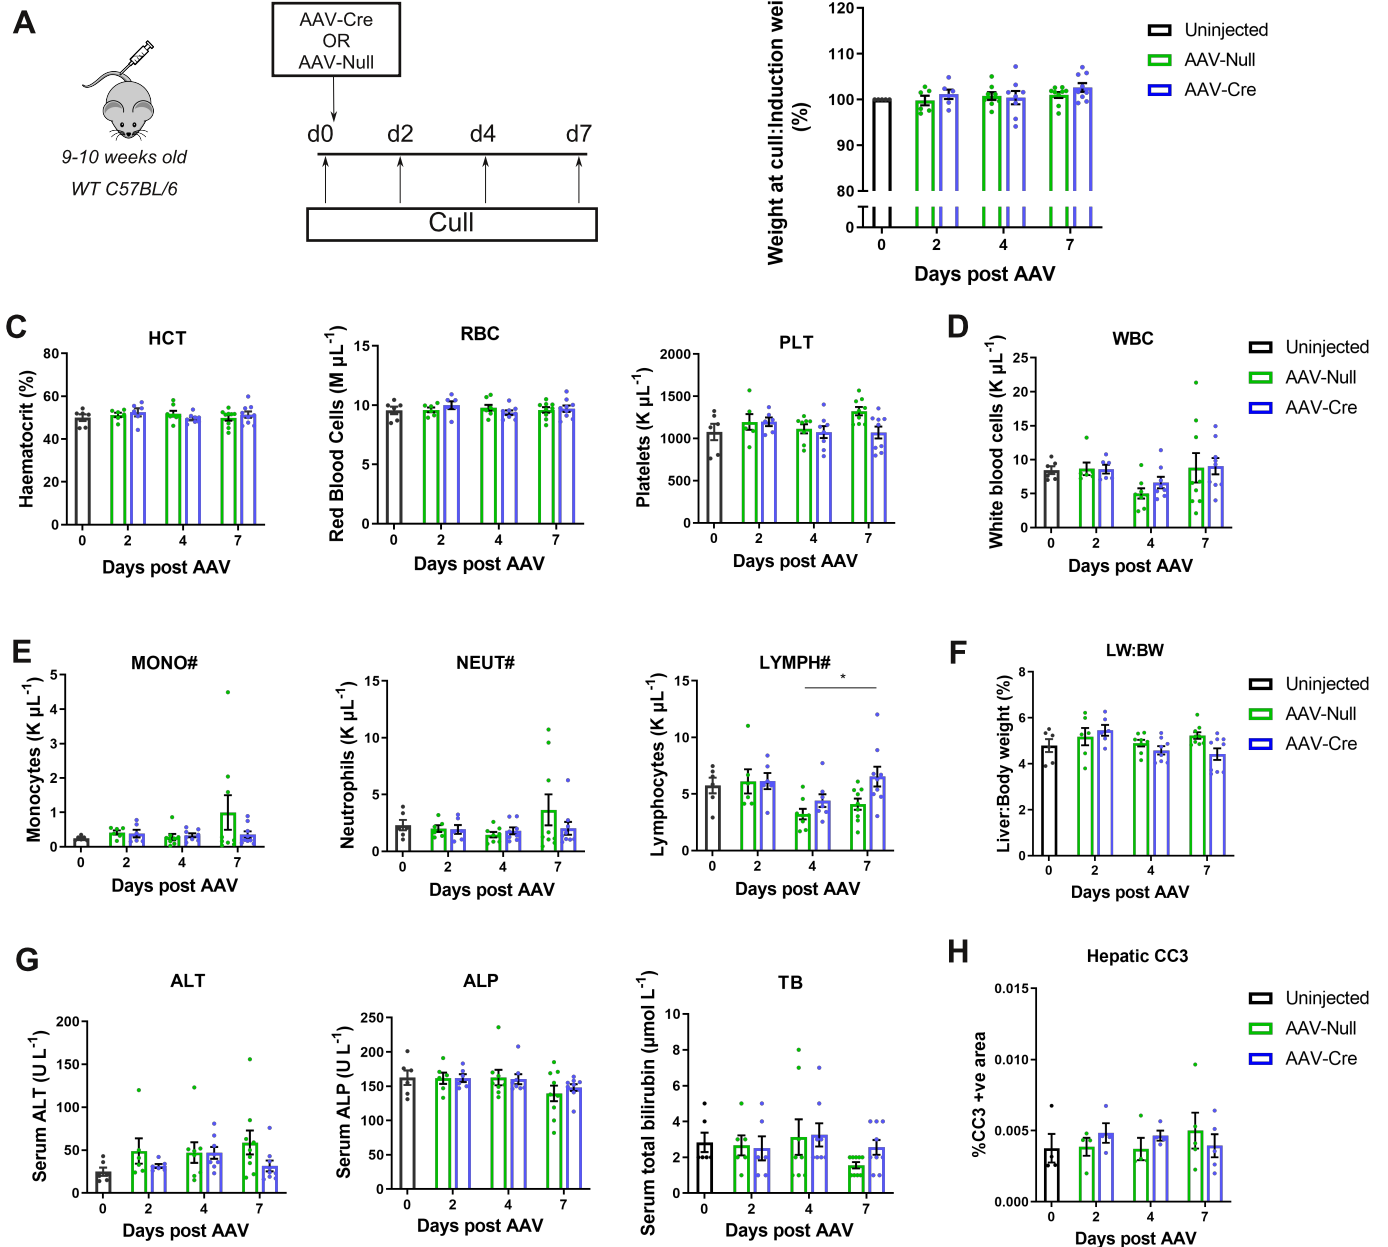

### Figure 3

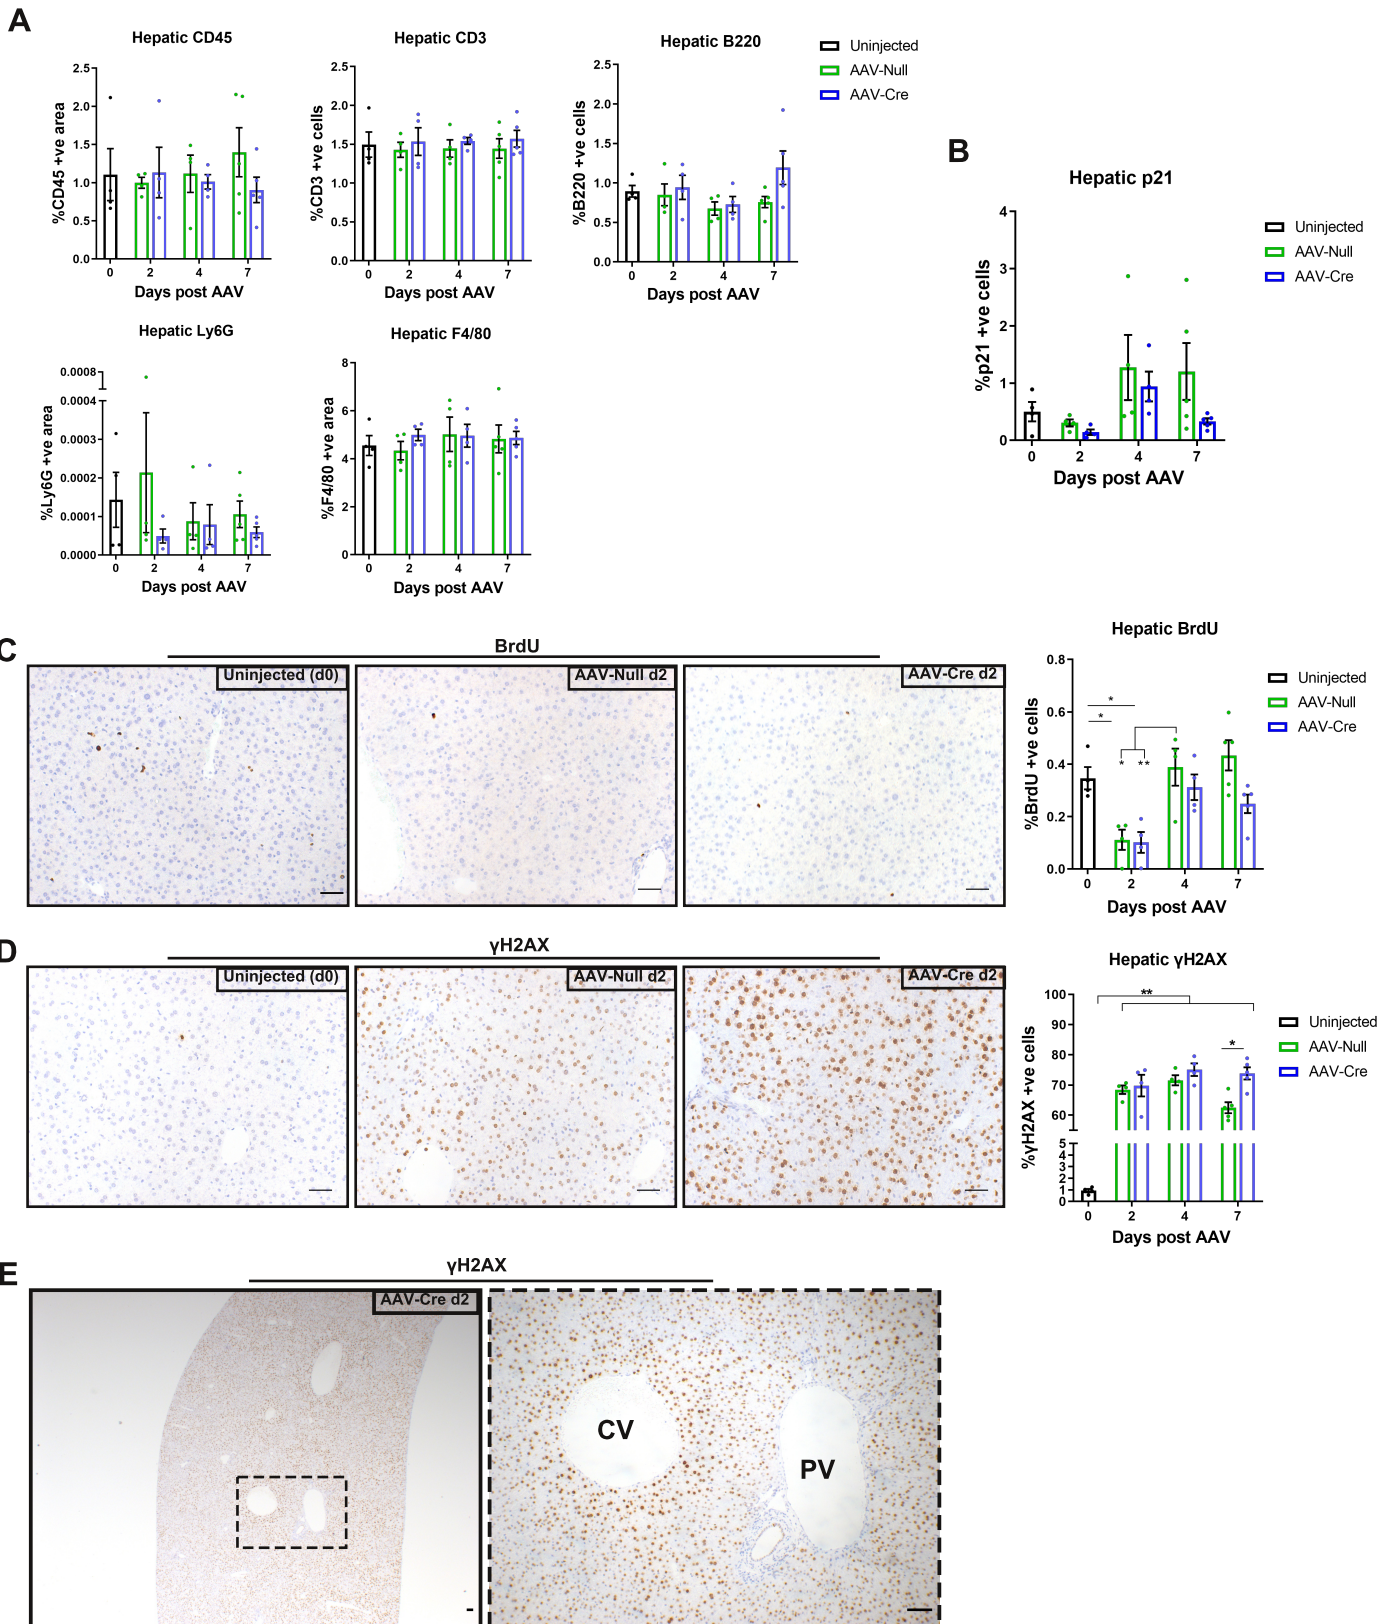

**Figure 4**

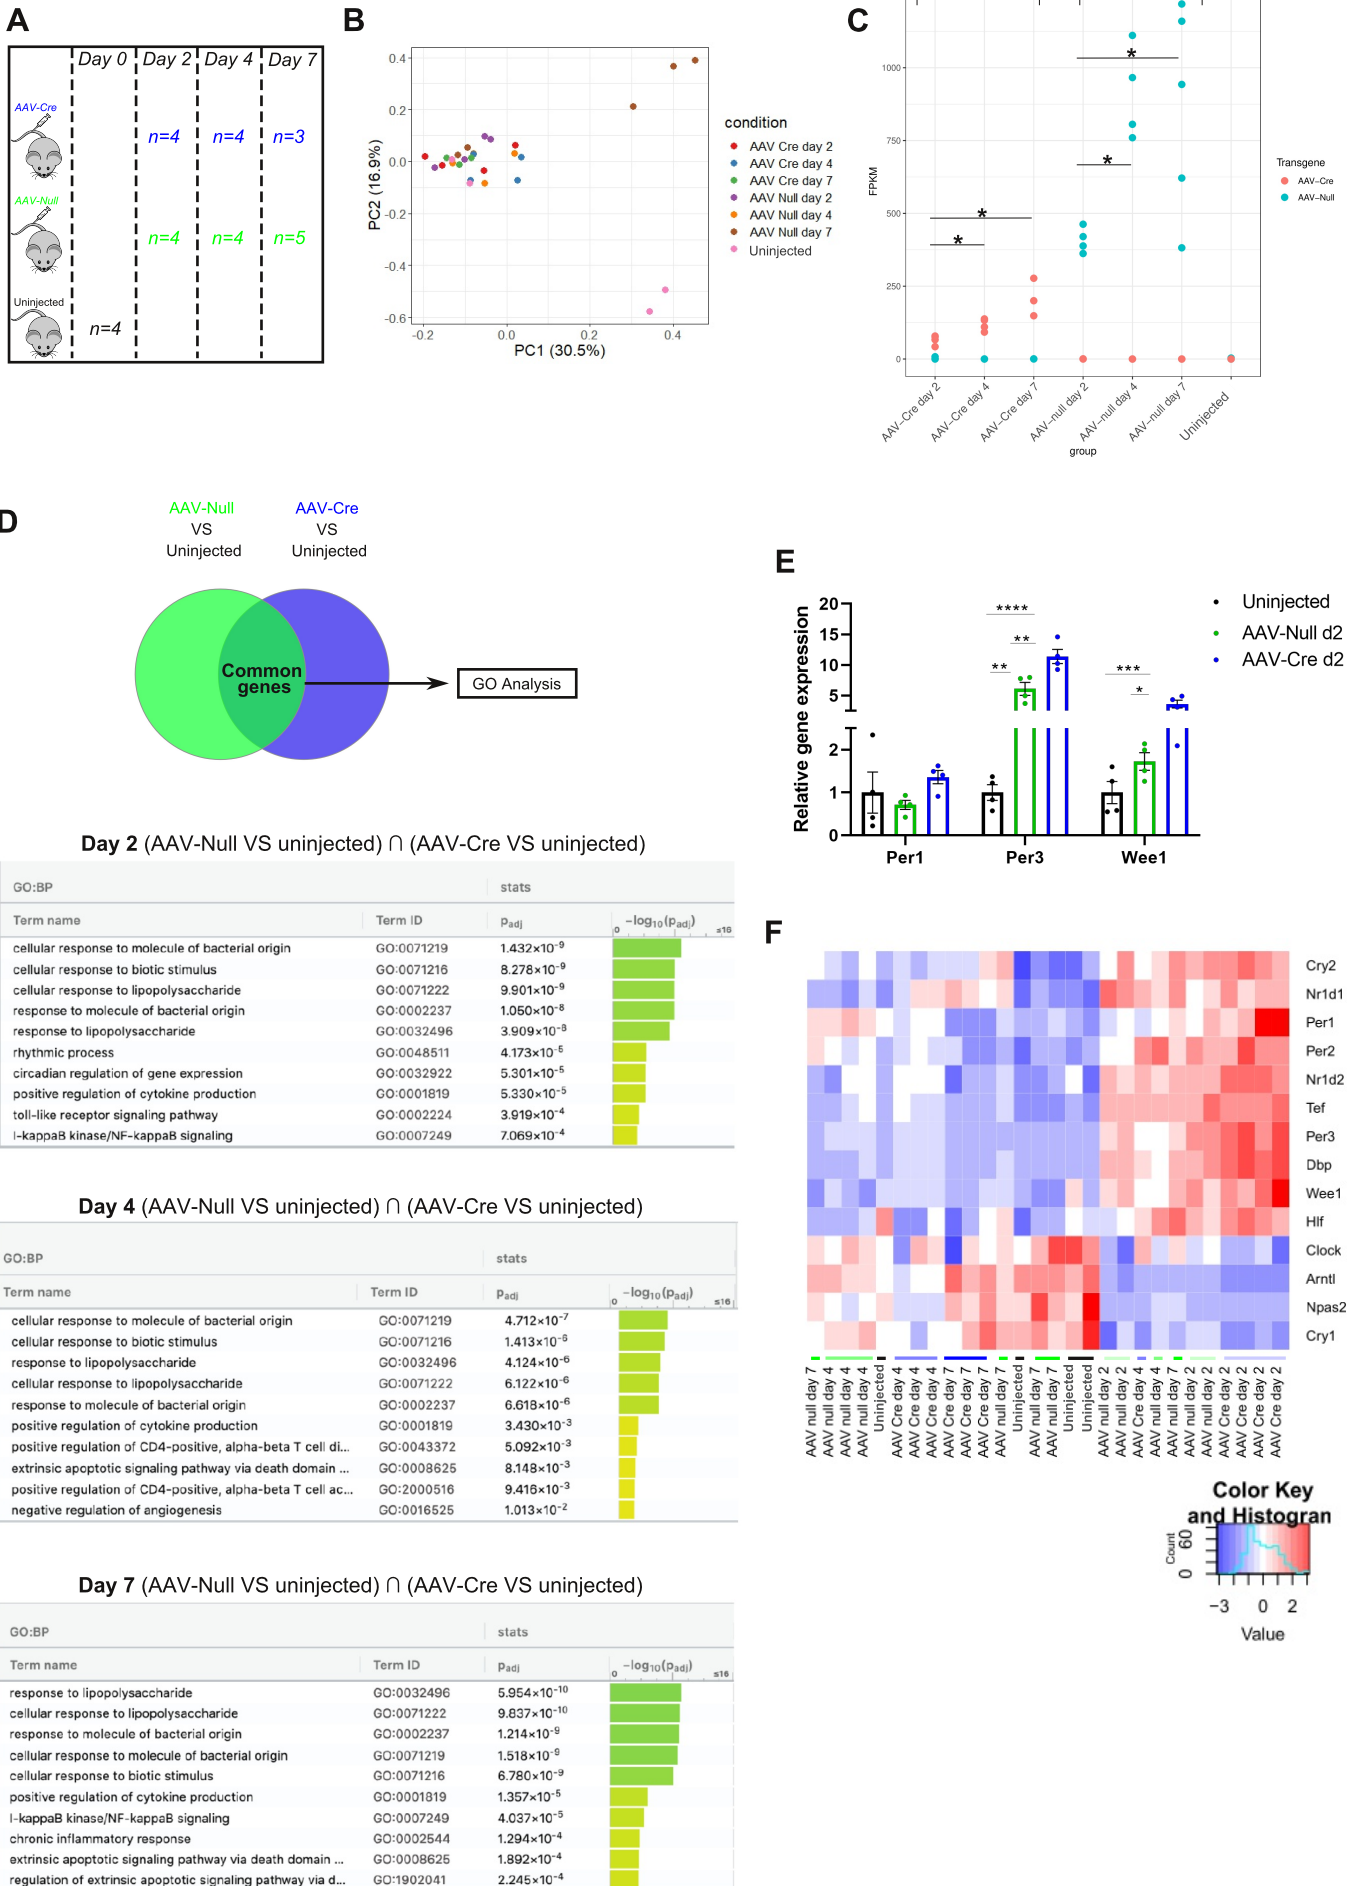

Source: https://biorxiv.org/content/10.1101/2021.02.19.431990v1.full.pdf
